# Supplementary material for: Remarkable microstructural reversibility of antimony in sodium ion battery anodes
Source: Royal Society of Chemistry journal article supplement (doi:10.1039/d0ta08611h), 2020-01-01
Supplement: d0ta08611h5.pdf [file d0ta08611h5.pdf]

## Supporting Information

# Remarkable Microstructural Reversibility of Antimony in Sodium Ion Battery Anodes

Baskar Selvaraj<sup>1</sup>, Chun-Chieh Wang<sup>2</sup>, Yen-Fang Song<sup>2</sup>, Hwo-Shuenn Sheu<sup>2</sup>, Yen-Fa Liao<sup>2</sup>, Nae-Lih Wu<sup>1,3\*</sup>

<sup>1</sup>Department of Chemical Engineering, National Taiwan University, No. 1, Roosevelt Road, Section 4, Daan district, Taipei 10617, Taiwan

<sup>2</sup>National Synchrotron Radiation Research Center, No. 101, Hsin-Ann road, Hsinchu Science Park, Hsinchu 30076, Taiwan

<sup>3</sup>Advanced Research Center for Green Materials Science and Technology, National Taiwan University, Taipei 10617, Taiwan

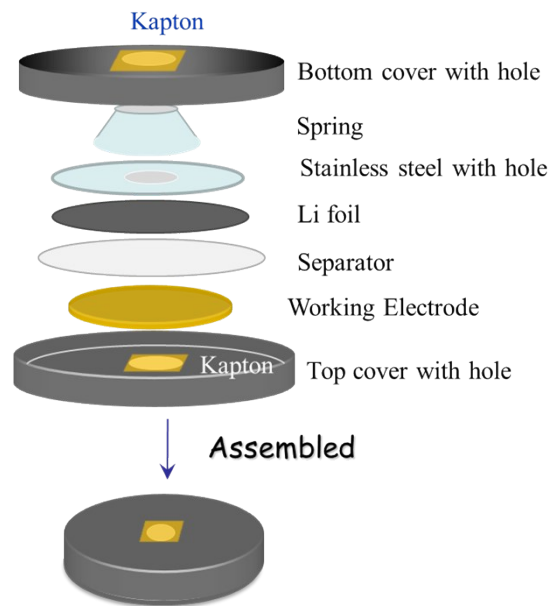

**Figure S1:** Schematic drawing of perforated coin cell assembly used for TXM analysis.
